# Supplementary material for: Commercial Brain Training: Efficacy, Transfer Effects, and the Influence of Personality Traits: A Study Conducted on Healthy Young Adults
Source: MDPI journal article supplement (doi:10.3390/brainsci11081083), 2021-08-18

# Supplementary Materials: brainsci-1274903

Supplementary Table S1: NeuroNation training tasks

| Task      | Description                                                                                                                                                                                                                                                                                                                                              | Training Program | Performed at least 6 times by n participants | Graphics                                                                              |
|-----------|----------------------------------------------------------------------------------------------------------------------------------------------------------------------------------------------------------------------------------------------------------------------------------------------------------------------------------------------------------|------------------|----------------------------------------------|---------------------------------------------------------------------------------------|
| BinMemo   | Here the balls in each box must be counted and the information about how many balls are in each box must be constantly updated.                                                                                                                                                                                                                          | WM program       | 26                                           |    |
| PathMemo  | Moving circles must be tapped in the displayed order.                                                                                                                                                                                                                                                                                                    | WM program       | 25                                           |   |
| Shuffler  | It must be remembered on which places the individual figures stand, whereby they can change their places concealed.                                                                                                                                                                                                                                      | WM program       | 24                                           |  |
| Symbolski | In the Pattern Finder exercise, the challenge is to perform a memory task (assigning a number to a symbol). By changing the places of the symbols and letters, it is more difficult to memorize the number-symbol-combination. Since the memorization does not take place in the central field of vision, the exercise also trains the processing speed. | WM program       | 21                                           |  |

|                 |                                                                                                                                                                             |                   |    |                                                                                       |
|-----------------|-----------------------------------------------------------------------------------------------------------------------------------------------------------------------------|-------------------|----|---------------------------------------------------------------------------------------|
| FormFever       | One must decide whether the displayed pattern corresponds to the displayed description and the impulse to answer quickly must be suppressed in favor of a correct answer.   | WM program        | 28 |    |
| DynamicSequence | The following of a displayed number must be found.                                                                                                                          | Attention program | 22 |    |
| IntruderCraft   | The task is to detect minimal differences in a large number of strongly similar shapes.                                                                                     | Attention program | 22 |   |
| Mackworth       | The questions asked in the middle of a clock must be answered by following the movement of the clock hand.                                                                  | Attention program | 25 |  |
| MathChain       | Through mathematical exercises, basic arithmetic and memory are trained.                                                                                                    | Attention program | 22 |  |
| ParaChain       | In each box, a mental calculation task must be executed in parallel, i.e independently of the other boxes, while constantly keeping the last results of each box in memory. | Attention program | 20 |  |

|               |                                                                                                                                                                                           |                          |    |                                                                                      |
|---------------|-------------------------------------------------------------------------------------------------------------------------------------------------------------------------------------------|--------------------------|----|--------------------------------------------------------------------------------------|
| ColorCraze    | Symbols and colors must be named correctly, while content and color are displayed differently (Stroop test).                                                                              | WM and attention program | 48 |   |
| PathPredictor | The challenge in searching for clues is to implement the route description in the mind's eye. At the same time, the route already taken must be temporarily stored in the working memory. | WM and attention program | 39 |   |
| Rotator       | You must select the pattern that matches the one shown in the center.                                                                                                                     | WM and attention program | 46 |  |

Supplementary figure S2: Improvement in NeuroNation tasks

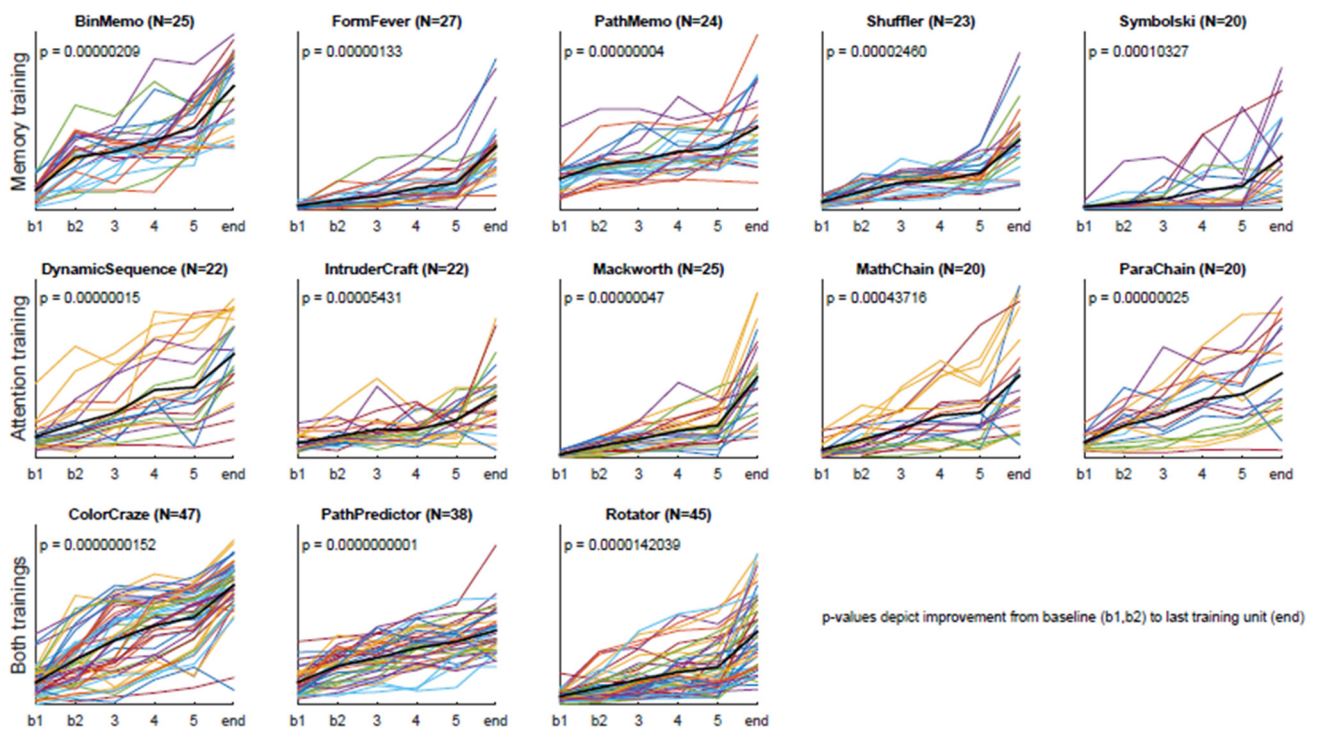

Supplement: s1 [file s1]
